# Supplementary material for: Label3DMaize: toolkit for 3D point cloud data annotation of maize shoots
Source: PubMed Central journal article supplement (PMC8105162; doi:10.1093/gigascience/giab031), 2021-05-07
Supplement: giab031_giga-d-20-00335_original_submission.pdf [file giab031_giga-d-20-00335_original_submission.pdf]

|                              |                                                                                                                                                                                                                                                                                                                                                                                                                                                                                                                                                                                                                                                                                                                                                                                                                                                                                                                                                                                                                                                                                                                                                                                                                                                                                                                                                                                                                                                                                                                                                                                                                                                                                                                                                                                                                                                                                                                                                                                                                                        |                  |
|------------------------------|----------------------------------------------------------------------------------------------------------------------------------------------------------------------------------------------------------------------------------------------------------------------------------------------------------------------------------------------------------------------------------------------------------------------------------------------------------------------------------------------------------------------------------------------------------------------------------------------------------------------------------------------------------------------------------------------------------------------------------------------------------------------------------------------------------------------------------------------------------------------------------------------------------------------------------------------------------------------------------------------------------------------------------------------------------------------------------------------------------------------------------------------------------------------------------------------------------------------------------------------------------------------------------------------------------------------------------------------------------------------------------------------------------------------------------------------------------------------------------------------------------------------------------------------------------------------------------------------------------------------------------------------------------------------------------------------------------------------------------------------------------------------------------------------------------------------------------------------------------------------------------------------------------------------------------------------------------------------------------------------------------------------------------------|------------------|
| <b>Manuscript Number:</b>    | GIGA-D-20-00335                                                                                                                                                                                                                                                                                                                                                                                                                                                                                                                                                                                                                                                                                                                                                                                                                                                                                                                                                                                                                                                                                                                                                                                                                                                                                                                                                                                                                                                                                                                                                                                                                                                                                                                                                                                                                                                                                                                                                                                                                        |                  |
| <b>Full Title:</b>           | Label3DMAize: toolkit for 3D point cloud data annotation of maize shoots                                                                                                                                                                                                                                                                                                                                                                                                                                                                                                                                                                                                                                                                                                                                                                                                                                                                                                                                                                                                                                                                                                                                                                                                                                                                                                                                                                                                                                                                                                                                                                                                                                                                                                                                                                                                                                                                                                                                                               |                  |
| <b>Article Type:</b>         | Research                                                                                                                                                                                                                                                                                                                                                                                                                                                                                                                                                                                                                                                                                                                                                                                                                                                                                                                                                                                                                                                                                                                                                                                                                                                                                                                                                                                                                                                                                                                                                                                                                                                                                                                                                                                                                                                                                                                                                                                                                               |                  |
| <b>Funding Information:</b>  | Construction of Collaborative Innovation Center of Beijing Academy of Agricultural and Forestry Sciences (KJCX201917)                                                                                                                                                                                                                                                                                                                                                                                                                                                                                                                                                                                                                                                                                                                                                                                                                                                                                                                                                                                                                                                                                                                                                                                                                                                                                                                                                                                                                                                                                                                                                                                                                                                                                                                                                                                                                                                                                                                  | prof. Xinyu Guo  |
|                              | Science and Technology Innovation Special Construction Funded Program of Beijing Academy of Agriculture and Forestry Sciences                                                                                                                                                                                                                                                                                                                                                                                                                                                                                                                                                                                                                                                                                                                                                                                                                                                                                                                                                                                                                                                                                                                                                                                                                                                                                                                                                                                                                                                                                                                                                                                                                                                                                                                                                                                                                                                                                                          | Dr. Weiliang Wen |
|                              | National Natural Science Foundation of China (31871519)                                                                                                                                                                                                                                                                                                                                                                                                                                                                                                                                                                                                                                                                                                                                                                                                                                                                                                                                                                                                                                                                                                                                                                                                                                                                                                                                                                                                                                                                                                                                                                                                                                                                                                                                                                                                                                                                                                                                                                                | prof. Xinyu Guo  |
|                              | Reform and Development Project of Beijing Academy of agricultural and Forestry Sciences                                                                                                                                                                                                                                                                                                                                                                                                                                                                                                                                                                                                                                                                                                                                                                                                                                                                                                                                                                                                                                                                                                                                                                                                                                                                                                                                                                                                                                                                                                                                                                                                                                                                                                                                                                                                                                                                                                                                                | Not applicable   |
|                              | China Agriculture Research System (CARS-02)                                                                                                                                                                                                                                                                                                                                                                                                                                                                                                                                                                                                                                                                                                                                                                                                                                                                                                                                                                                                                                                                                                                                                                                                                                                                                                                                                                                                                                                                                                                                                                                                                                                                                                                                                                                                                                                                                                                                                                                            | Not applicable   |
|                              | Construction of Scientific Research and Innovation Platform in Beijing Academy of Agriculture and Forestry Sciences (PT2020-24)                                                                                                                                                                                                                                                                                                                                                                                                                                                                                                                                                                                                                                                                                                                                                                                                                                                                                                                                                                                                                                                                                                                                                                                                                                                                                                                                                                                                                                                                                                                                                                                                                                                                                                                                                                                                                                                                                                        | prof. Xinyu Guo  |
| <b>Abstract:</b>             | <p><b>Background</b></p> <p>Three-dimensional (3D) point cloud is the most direct and effective data form for studying plant structure and morphology. In point cloud studies, the point cloud segmentation of individual plants to organs directly determines the accuracy of organ-level phenotype estimation and the 3D plant reconstruction reliability. However, highly accurate, automatic, and robust point cloud segmentation approaches for plants are unavailable. Thus, the high-throughput segmentation of many shoots is challenging. Although deep learning can feasibly solve this issue, software tools for 3D point cloud annotation to construct the training dataset are lacking.</p> <p><b>Results</b></p> <p>In this paper, a top-to-down point cloud segmentation algorithm using optimal transportation distance for maize shoots is proposed. On this basis, a point cloud annotation toolkit, Label3DMAize, for maize shoot is developed. Further, the toolkit was applied to achieve semi-automatic point cloud segmentation and annotation of maize shoots at different growth stages, through a series of operations, including stem segmentation, coarse segmentation, fine segmentation, and sample-based segmentation. The toolkit takes about 4 to 10 minutes to segment a maize shoot, and consumes 10%-20% of the total time if only coarse segmentation is required. Fine segmentation is more detailed than coarse segmentation, especially at the organ connection regions. The accuracy of coarse segmentation can reach 97.2% of the fine segmentation.</p> <p><b>Conclusion</b></p> <p>Label3DMAize integrates point cloud segmentation algorithms and manual interactive operations, realizing semi-automatic point cloud segmentation of maize shoots at different growth stages. The toolkit provides a practical data annotation tool for further online segmentation researches based on deep learning and is expected to promote automatic point cloud processing of various plants.</p> |                  |
| <b>Corresponding Author:</b> | Xinyu Guo, Ph.D.<br>Beijing Research Center for Information Technology in Agriculture: National                                                                                                                                                                                                                                                                                                                                                                                                                                                                                                                                                                                                                                                                                                                                                                                                                                                                                                                                                                                                                                                                                                                                                                                                                                                                                                                                                                                                                                                                                                                                                                                                                                                                                                                                                                                                                                                                                                                                        |                  |

|                                                                                                                                                                                                                                                                                                                                    |                                                                                                                                                      |
|------------------------------------------------------------------------------------------------------------------------------------------------------------------------------------------------------------------------------------------------------------------------------------------------------------------------------------|------------------------------------------------------------------------------------------------------------------------------------------------------|
|                                                                                                                                                                                                                                                                                                                                    | Engineering Research Center for Information Technology in Agriculture<br>Beijing, CHINA                                                              |
| <b>Corresponding Author Secondary Information:</b>                                                                                                                                                                                                                                                                                 |                                                                                                                                                      |
| <b>Corresponding Author's Institution:</b>                                                                                                                                                                                                                                                                                         | Beijing Research Center for Information Technology in Agriculture: National<br>Engineering Research Center for Information Technology in Agriculture |
| <b>Corresponding Author's Secondary Institution:</b>                                                                                                                                                                                                                                                                               |                                                                                                                                                      |
| <b>First Author:</b>                                                                                                                                                                                                                                                                                                               | Teng Miao                                                                                                                                            |
| <b>First Author Secondary Information:</b>                                                                                                                                                                                                                                                                                         |                                                                                                                                                      |
| <b>Order of Authors:</b>                                                                                                                                                                                                                                                                                                           | Teng Miao                                                                                                                                            |
|                                                                                                                                                                                                                                                                                                                                    | Weiliang Wen                                                                                                                                         |
|                                                                                                                                                                                                                                                                                                                                    | Sheng Wu                                                                                                                                             |
|                                                                                                                                                                                                                                                                                                                                    | Chao Zhu                                                                                                                                             |
|                                                                                                                                                                                                                                                                                                                                    | Yinglun Li                                                                                                                                           |
|                                                                                                                                                                                                                                                                                                                                    | Xinyu Guo, Ph.D.                                                                                                                                     |
| <b>Order of Authors Secondary Information:</b>                                                                                                                                                                                                                                                                                     |                                                                                                                                                      |
| <b>Additional Information:</b>                                                                                                                                                                                                                                                                                                     |                                                                                                                                                      |
| <b>Question</b>                                                                                                                                                                                                                                                                                                                    | <b>Response</b>                                                                                                                                      |
| Are you submitting this manuscript to a special series or article collection?                                                                                                                                                                                                                                                      | No                                                                                                                                                   |
| <b>Experimental design and statistics</b>                                                                                                                                                                                                                                                                                          | Yes                                                                                                                                                  |
| Full details of the experimental design and statistical methods used should be given in the Methods section, as detailed in our <a href="#">Minimum Standards Reporting Checklist</a> . Information essential to interpreting the data presented should be made available in the figure legends.                                   |                                                                                                                                                      |
| Have you included all the information requested in your manuscript?                                                                                                                                                                                                                                                                |                                                                                                                                                      |
| <b>Resources</b>                                                                                                                                                                                                                                                                                                                   | Yes                                                                                                                                                  |
| A description of all resources used, including antibodies, cell lines, animals and software tools, with enough information to allow them to be uniquely identified, should be included in the Methods section. Authors are strongly encouraged to cite <a href="#">Research Resource Identifiers</a> (RRIDs) for antibodies, model |                                                                                                                                                      |

|                                                                                                                                                                                                                                                                                                                                                                                                                                                                                                                                                         |            |
|---------------------------------------------------------------------------------------------------------------------------------------------------------------------------------------------------------------------------------------------------------------------------------------------------------------------------------------------------------------------------------------------------------------------------------------------------------------------------------------------------------------------------------------------------------|------------|
| <p>organisms and tools, where possible.</p> <p>Have you included the information requested as detailed in our <a href="#">Minimum Standards Reporting Checklist?</a></p>                                                                                                                                                                                                                                                                                                                                                                                |            |
| <p><b>Availability of data and materials</b></p> <p>All datasets and code on which the conclusions of the paper rely must be either included in your submission or deposited in <a href="#">publicly available repositories</a> (where available and ethically appropriate), referencing such data using a unique identifier in the references and in the “Availability of Data and Materials” section of your manuscript.</p> <p>Have you have met the above requirement as detailed in our <a href="#">Minimum Standards Reporting Checklist?</a></p> | <p>Yes</p> |

# Label3DMaize: toolkit for 3D point cloud data annotation of maize shoots

Teng Miao<sup>1,†</sup>, Weiliang Wen<sup>2,3,4,†</sup>, Sheng Wu<sup>2,3,4</sup>, Chao Zhu<sup>1</sup>, Yinglun Li<sup>3,4</sup>, Xinyu Guo<sup>2,3,4,\*</sup>

<sup>1</sup> College of Information and Electrical Engineering, Shenyang Agricultural University, Shenyang 110161, China.

<sup>2</sup> Beijing Research Center for Information Technology in Agriculture, Beijing 100097, China.

<sup>3</sup> National Engineering Research Center for Information Technology in Agriculture, Beijing 100097, China.

<sup>4</sup> Beijing Key Lab of Digital Plant, Beijing 100097, China.

\* For correspondence. Email: [guoxy73@163.com](mailto:guoxy73@163.com) (Xinyu Guo)

† Co-first authors.

## Abstract

**Background:** Three-dimensional (3D) point cloud is the most direct and effective data form for studying plant structure and morphology. In point cloud studies, the point cloud segmentation of individual plants to organs directly determines the accuracy of organ-level phenotype estimation and the 3D plant reconstruction reliability. However, highly accurate, automatic, and robust point cloud segmentation approaches for plants are unavailable. Thus, the high-throughput segmentation of many shoots is challenging. Although deep learning can feasibly solve this issue, software tools for 3D point cloud annotation to construct the training dataset are lacking. **Results:** In this paper, a top-to-down point cloud segmentation algorithm using optimal transportation distance for maize shoots is proposed. On this basis, a point cloud annotation toolkit, Label3DMaize, for maize shoot is developed. Further, the toolkit was applied to achieve semi-automatic point cloud segmentation and annotation of maize shoots at different growth stages, through a series of operations, including stem segmentation, coarse segmentation, fine segmentation, and sample-based segmentation. The toolkit takes about 4 to 10 minutes to segment a maize shoot, and consumes 10%-20% of the total time if only coarse segmentation is required. Fine segmentation is more detailed than coarse segmentation, especially at the organ connection regions. The accuracy of coarse segmentation can reach 97.2% of the fine segmentation. **Conclusion:** Label3DMaize integrates point cloud segmentation algorithms and manual interactive operations, realizing semi-automatic point cloud segmentation of maize shoots at different growth stages. The toolkit provides a practical data annotation tool for further online segmentation researches based on deep learning and is expected to promote automatic point cloud processing of various plants.

**Key words:** Label3DMaize, three-dimensional point cloud, segmentation, maize shoot, data annotation.

## 1 Introduction

The plant structure and morphology are important features for expressing growth and development. At present many research studies underpin the significance of integrating the three-dimensional (3D) morphological characteristics of plants when conducting genetic mapping, adaptability evaluation, and crop yield analysis [1, 2]. Using the 3D data acquisition technology to obtain a 3D point cloud is the most effective way to perceive the plant structure and morphology digitally. However, 3D point clouds are initially obtained in an unordered, unstructured manner and with little semantic information. Therefore, it is critical to use computer graphics technologies and plant morphology knowledge to convert the unstructured 3D point clouds into well-organized and structured data that contains rich morphological features with semantic information. Therefore, plant morphology research based on measured point clouds forms a critical

---

42 component of 3D plant phenomics [3-5], 3D plant reconstruction [2, 6], and functional-structural plant  
43 models (FSPMs) [7, 8].

44 The development of 3D data acquisition technology has significantly enriched approaches for fine-scale  
45 3D data acquisition of individual plants, including 3D scanning [9, 10], LiDAR [11], depth camera [12], time  
46 of flight (ToF) reconstruction [13], and multi-view stereo (MVS) reconstruction [14, 15]. Owing to the low  
47 cost of sensors and better quality of reconstructed point clouds, MVS reconstruction have been widely  
48 adopted in many applications. Recently, multi-view image acquisition platforms that can realize semi-  
49 automatic and high-throughput 3D data acquisition for individual plants have been developed [16] and enable  
50 3D data acquisition for the phenotypic analysis of large-scale breeding materials [17, 18]. However, how to  
51 efficiently and automatically process the acquired big data of 3D point clouds is a bottleneck in 3D plant  
52 phenotyping.

53 The key technologies for 3D point cloud data processing include data registration, the region of interest  
54 extraction, denoising, segmentation, feature extraction, and mesh generation. Among these tasks, point cloud  
55 segmentation is challenging. Therefore, automatic and accurate point cloud segmentation could significantly  
56 impact subsequent results of phenotype extraction and 3D reconstruction. Point cloud segmentation can be  
57 classified as population-shoot or shoot-organ segmentation. Population-shoot segmentation allows for  
58 automatic segmentation of maize population under low density [19] or at early growth stages [20, 21] with  
59 little overlap, which can be realized via the spatial distance between shoots. However, it is difficult to achieve  
60 automatic segmentation of high density populations or with many overlapping organs in late growth stages.  
61 Comparatively, more attention has been paid to shoot-organ segmentation. Though high-quality input point  
62 clouds and restricted connections between organs are required, color-based [22] and point clustering [23-25]  
63 approaches have also been widely used. For instance, Elnashef et al. [14] used the local geometric features  
64 of the organs to segment maize leaves and stems at six-leaf stage. Paulus et al. [26, 27] segmented the grape  
65 shoot organs by integrating fast point feature histograms (FPFH), support vector machine (SVM), and region  
66 growing approaches. However, these methods can only segment plant shoots with clear connection  
67 characteristics between stems and leaves [9] and can hardly solve leaf wrapping stem segmentation problems.  
68 For time-series 3D point clouds, the leaf multi-labeling segmentation method was used for organ  
69 segmentation and plant growth monitoring [28]. While plant organs could also be segmented through skeleton  
70 extraction and hierarchical clustering [29, 30], these methods need interactive manual correction for complex  
71 plants to guarantee the segmentation accuracy. Jin et al. [31] proposed a median normalized vector growth  
72 algorithm that can segment the stems and leaves of maize shoots. On this basis, an annotation dataset of  
73 maize shoots was constructed, and the deep learning method was introduced to improve the automatic  
74 segmentation level [32]. However, few parameter interactions are still needed for different shoot architecture  
75 and cannot meet the needs of high realistic 3D reconstruction.

76 Due to the complexity of plant morphology and structure, almost all 3D point cloud segmentation  
77 methods for plants need certain manual interaction, which is inconvenient for huge amounts of point cloud  
78 data processing, and substantially decreases the efficiency. Therefore, it is necessary to improve the  
79 automation of segmentation and increase the throughput of 3D point cloud data processing for plants. Deep  
80 learning approaches can effectively solve this problem [33, 34], among which the construction of high-quality  
81 training data set is a prerequisite. For example, LabelMe [35] can realize high-quality data annotation for  
82 image segmentation. However, 3D point cloud tools for data annotation are rare, especially for plants. Besides,  
83 the existing datasets for 3D plant segmentation contain only little data [34, 36, 37], which cannot meet the  
84 data requirements for high-quality deep learning models.

85 Since point cloud annotation of plants is labor-intensive and time-consuming, deep learning approaches

---

86 can be applied to segment plant point clouds. Hence, how to improve the efficiency of high-quality data  
87 annotation and develop supporting software tools is the key to automatic point cloud segmentation of plants  
88 by deep learning. To meet this data annotation demand, this study used maize as an example and proposes a  
89 top-to-down point cloud segmentation algorithm. Besides, a toolkit for point cloud annotation of maize shoots  
90 is developed, which could provide technical support for automatic and high-throughput processing of plant  
91 point clouds.

## 92 2 Materials and Methods

### 93 2.1 Field experiment and data acquisition

94 Three maize cultivars, including MC670, Xianyu 335 (XY335), and NK815, were planted on May 20<sup>th</sup>,  
95 2019, at the Tongzhou experimental field of Beijing Academy of Agriculture and Forestry Sciences  
96 (116.70°E, 39.71°N). The planting density of all the plots was six plants/m<sup>2</sup> with a row spacing of 60 cm.  
97 Morphological representative shoots of each cultivar at 6<sup>th</sup> leaf (V6), 9<sup>th</sup> leaf (V9), 13<sup>th</sup> leaf (V13), and blister  
98 (R2) stages [38], were selected and transplanted into pots. Then multi-view images were acquired using the  
99 MVS-Pheno platform [16], after which 3D point clouds of the shoots were reconstructed.

### 100 2.2 Overview of the segmentation pipeline

101 The point cloud of a maize shoot can be segmented into five kinds of instances: stem, leaf, tassel, ear,  
102 and pot. The stem, tassel, and pot on a shoot can be regarded as an instance for each. For each transplanted  
103 shoot at stage R2, assuming that it contains  $n_1$  ears and  $n_2$  leaves, the point cloud of this shoot can thus be  
104 segmented into  $N=3+n_1+n_2$  instances.  $\Phi_u$  represents the point cloud to be segmented, and  $\Phi_s^i$  ( $i =$   
105  $1, 2, \dots, N$ ) represent the  $i^{\text{th}}$  point cloud instance. In particular,  $\Phi_s^1$  and  $\Phi_s^N$  refer to the stem and pot (if  
106 exists) instance, respectively. Before the segmentation begins,  $\Phi_u$  contains all the points of the shoot, and  
107  $\Phi_s^i$  are all empty. With the progression of segmentation, the points in  $\Phi_u$  are gradually assigned to  $\Phi_s^i$ . The  
108 segmentation completes when  $\Phi_u$  is empty.

109 The segmentation pipeline includes five parts (Figure 1): point cloud down-sampling, stem  
110 segmentation, coarse segmentation, fine segmentation, and sample-based segmentation. (1) Point cloud  
111 down-sampling. The original input point cloud is down sampled to maintain the shoot morphological features,  
112 which improves the segmentation efficiency and quickens the entire segmentation process. (2) Stem  
113 segmentation. The top and bottom points of the stem are interactively selected, and the corresponding radius  
114 parameters are interactively adjusted. Subsequently, the median region growing is applied to segment the  
115 stem points from the shoot automatically. (3) Coarse segmentation. The highest points of each organ instance,  
116 except the stem, are obtained via automatic calculation or manual interaction, after which all organ instances  
117 are segmented automatically based on the optimal transportation distances. (4) Fine segmentation. The  
118 unsatisfactory segmentation point regions are selected interactively, and the seed points of organ instances  
119 are selected. Organs are then segmented by Markov random fields (MRF). (5) Sample-based segmentation.  
120 Maize shoots with high-resolution point clouds are segmented based on the fine segmentation result of low-  
121 resolution point clouds.

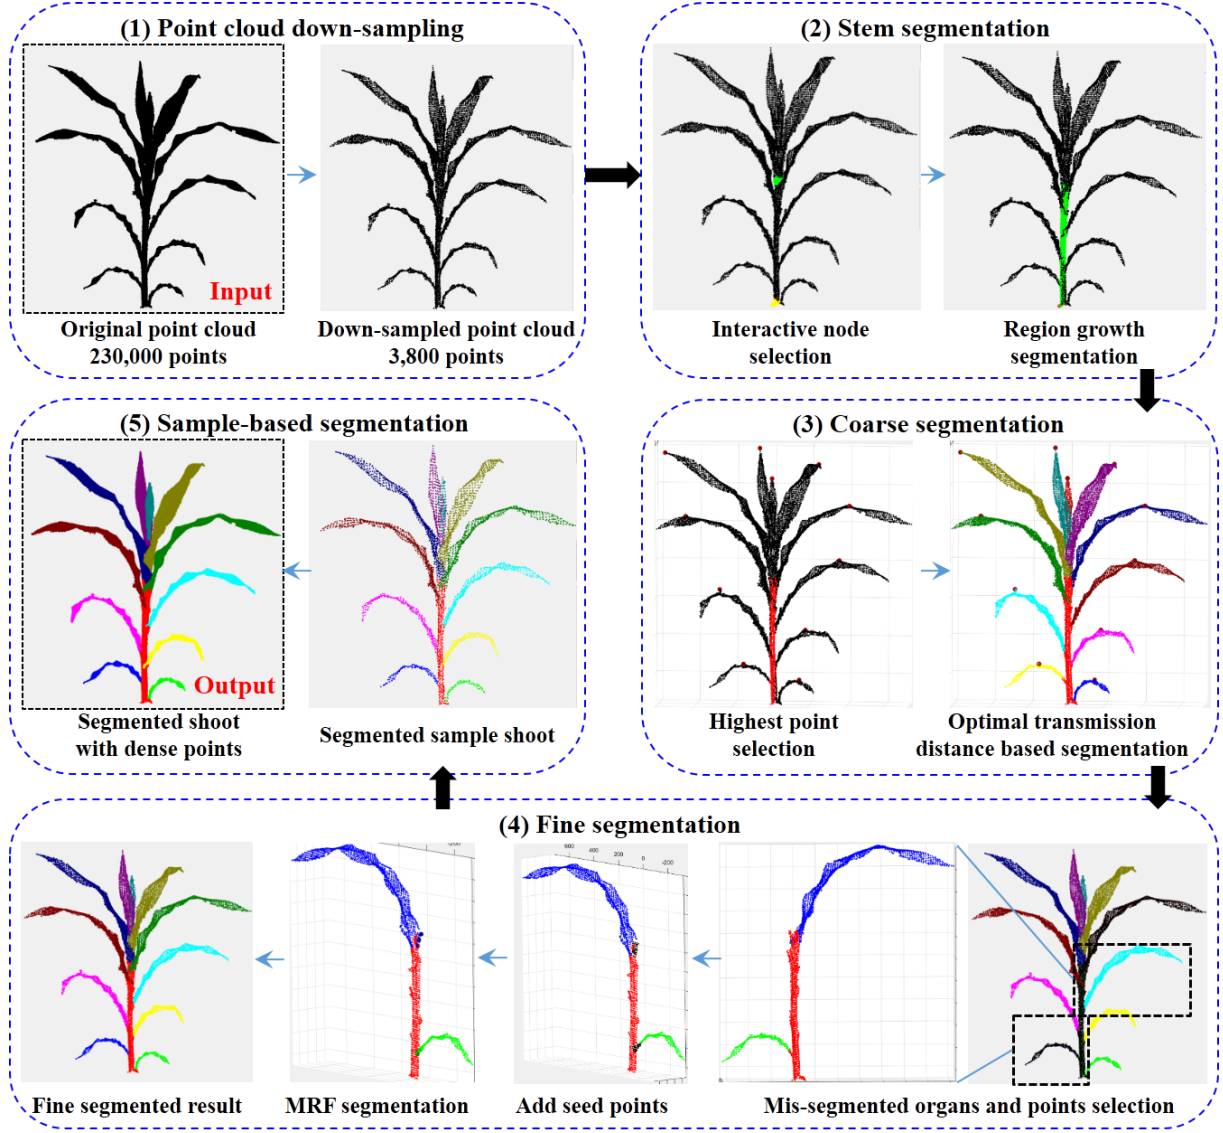

122

123

Figure 1: workflow of the segmentation

124

### 2.3 Stem segmentation

125

Two seed points  $s_0$  and  $s_n$  at the bottom and top of each stem, were selected interactively. Then, a median-based region growing algorithm [31] was applied to segment the stem points. This segmentation procedure update the seed point iteratively along the direction from  $s_0$  to  $s_n$ . Points around the seed points were classified into stem points. Suppose the algorithm is currently at the  $k^{\text{th}}$  iteration, and the seed point is  $s_k$ , the segmentation process was evaluated as follows:

130

Step1: Points lying in a sphere were classified as stem points, where  $s_k$  is the center of the sphere,  $r_1$  is its radius, and  $r_1$  is a user-specified parameter.

132

Step 2: The growth direction  $\vec{v}_k$  was determined according to:

133

$$\vec{v}_k = (\alpha \vec{v}_1 + \beta \vec{v}) / \|\alpha \vec{v}_1 + \beta \vec{v}\|_2$$

134

$$\vec{v}_1 = \text{median}\{(p_A - s_k) / \|p_A - s_k\|_2, p_A \in A\}$$

135

$$\vec{v} = (s_n - s_k) / \|s_n - s_k\|_2$$

136

In this formula,  $\|\cdot\|_2$  is L<sub>2</sub> normal form, and  $\text{median}\{\cdot\}$  represents the median operation.  $\alpha$  and  $\beta$  are weight parameters set by users and  $\vec{v}_1$  is the normalized vector from the median of already segmented points of the stem to the seed point  $s_k$ . Meanwhile,  $\vec{v}$  is the normalized vector from  $s_k$  to  $s_n$ , which

138



139 corrects the growth direction to coincide with the stem. In practice,  $\alpha = 0.2$  while  $\beta = 0.8$ . This parameter  
140 setting ensures that the stem points can be correctly segmented under different  $r_1$  values, during the entire  
141 growing process.

142 Step 3: A new seed point  $s_{k+1}$  for the next iteration was estimated according to  $s_{k+1} = s_k + r_1 \vec{v}_k$ .

143 Step 4: Region growing finish condition judgement. Supposing  $L$  represents the line segment from  $s_0$   
144 to  $s_n$ , then project  $s_{k+1}$  on  $L$ . If the projection point was not on  $L$ , it indicated that the current regional  
145 growth was beyond the stem region, and the iteration should be stopped. Otherwise, continue the  $k+1$  times  
146 iteration and execute step 1.

147 Because the maize stem gradually thins from bottom to top, a uniform radius  $r_1$  may generate over  
148 segmentation, i.e., classifying the points of other organs into the stem. Besides, the region growing algorithm  
149 also over segments points in some regions at the bending of the stem. Therefore, a simple median operation  
150 was adopted to eliminate the over segmented points. First, the already segmented stem points were evenly  
151 divided into  $M$  segments along the direction of  $(s_n - s_0) / \|s_n - s_0\|_2$ , and the median axis of each segment  
152 was fitted using the least squares. The average distance from each point to the central axis was then calculated.  
153 If the distance from a point to the central axis was less than the average distance, it was retained as the stem  
154 point; otherwise it was removed from the stem to the unsegmented point set. Users can perform the median  
155 operation several times in the toolkit to reduce the over-segmentation problem. Although multiple median  
156 operations cause an under segmentation of stem point cloud, the issue is resolved in the subsequent organ  
157 segmentation processes.  $\phi_s^1$  represents the segmented stem points, and these points are removed from  $\phi_u$ .  
158 Subsequent organ segmentation is performed in the remaining point cloud. Stem point cloud segmentation is  
159 illustrated in Figure 2.

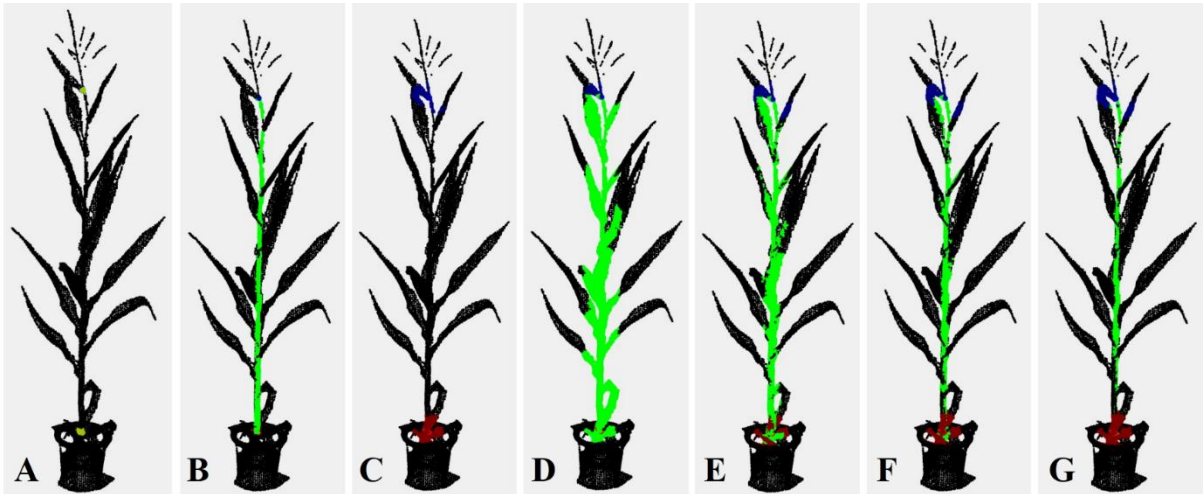

160  
161 Figure 2: Stem point cloud segmentation. (A) Seed points at the bottom and top of the stem are interactively selected, and an  
162 appropriate segmentation radius is set. (B) Stem segmentation result based on (A). (C) A big radius is set. (D) Segmentation  
163 result based on (C). (E)-(G) Stem segmentation results with 1, 2, and 3 median operations based on (D).

## 164 2.4 Shoot alignment

165 The shoot points were transformed into a regular coordinate system to access the position of each point  
166 in the cloud conveniently. The midpoint of the already segmented stem point cloud was taken as the origin  
167  $O$  of the new shoot coordinate system. In contrast, the Z-axis of the new coordinate system was the middle  
168 axis estimated by the least squares method from the stem point cloud. Then, the shoot point cloud was  
169 projected onto the plane using the Z-axis as its normal vector. The first and second principal component  
170 vectors of the projection points were determined by principal component analysis (PCA) and assigned as the



171 X and Y-axis of the new shoot coordinate system, respectively. Subsequently, the original point cloud  
172 coordinates were transformed into the new shoot coordinate system, and the coordinates of their  $z$  value  
173 judged the height of points in the shoot. Points are higher with greater  $z$  values.

## 174 2.5 Coarse segmentation of organs

175 A top-to-down point cloud segmentation algorithm for maize organs from a shoot was applied. The  
176 highest point of each organ was taken as the seed point of the organ (Figure 3A). The other shoot points after  
177 stem segmentation were classified into corresponding organ instances from top to down by the optimal  
178 transportation distances (Figure 3B).

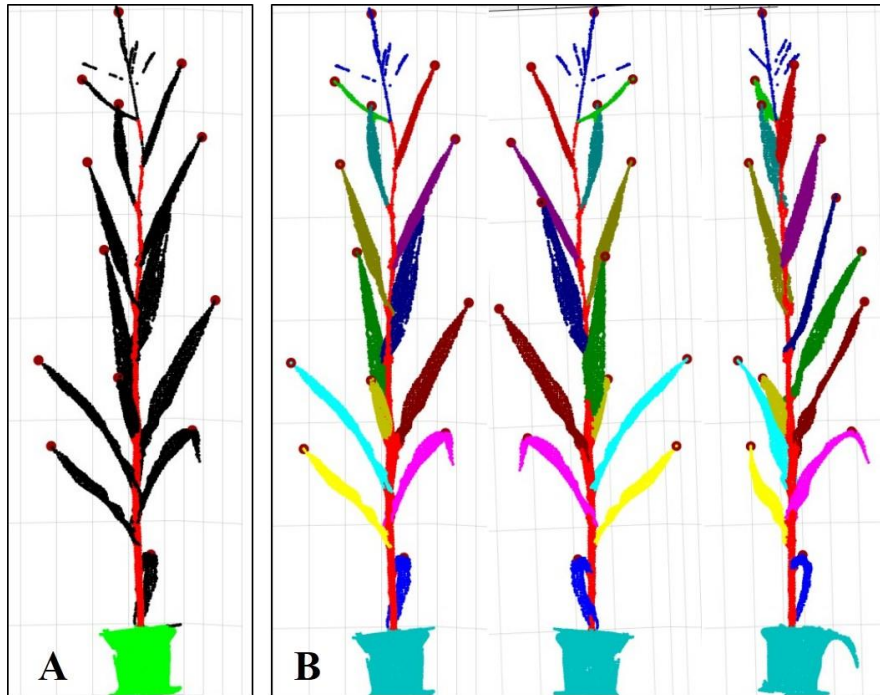

179  
180 Figure 3: Illustration of coarse segmentation. (A) Highest point determination of each organ. (B) Visualization of segmented  
181 shoot from different angles of view.

### 182 2.5.1 Organ seed points determination

183 After stem segmentation, the point cloud of maize shoots was spatially divided into several relatively  
184 discrete organs (excluding the stem). The highest point of each organ was regarded as the seed point (Figure  
185 3A). If a pot was involved in the point cloud, all points with a  $z$  value less than the lowest point of the stem  
186 were directly classified as pot points. Usually, the highest point of a new leaf appears at the tip region; the  
187 middle and lower fully unfolded leaves are mostly curved. Meanwhile, the highest point lies in the middle of  
188 the leaf, and the highest points of a tassel or ear are at the top. Therefore, the highest point of each organ was  
189 determined by searching for the point with the maximum  $z$  value.

190 For any point  $p$  of an organ, we searched its neighbors within a radius of  $r_2$ . If the  $z$  value of point  $p$   
191 was greater than that of its neighboring points, the point was regarded as the highest in the organ. The  
192 parameter  $r_2$  actually affects the recognition of the highest point of an organ. Too small  $r_2$  may cause the  
193 highest point found being the local highest point, rather than the global highest point of the current organ.  
194 Therefore,  $r_2$  was set 1.5 times of the leaf width by default, which allows users to set interactively according  
195 to the morphological characteristics of the target shoot.

196 Numerical experiments show that the highest points of most organs can be derived by setting the  
 197 appropriate  $r_2$ . However, the algorithm still has two problems. (1) When the distance between the highest  
 198 points of adjacent organs in the shoot vary significantly, it is difficult to find a suitable  $r_2$  to calculate all  
 199 complete and accurate highest points. For example, in some shoots, the highest points distance between new  
 200 emerging leaves is relatively close, while this distance between other leaves is relatively far. (2) Due to the  
 201 tassel branching structure, each branch has the highest point; multiple highest points of a tassel will be  
 202 detected using the same algorithm and settings, to ensure the highest points are correctly estimated in other  
 203 organs. If to ensure only one highest point is calculated in the tassel, the highest point of other organs may  
 204 be lost.

205 To solve the problem that the calculation of the highest point of organs may not be accurate,  
 206 Label3DMAize provides a manual interaction module to modify the highest seed point of each organ.  
 207 Simultaneously, this operation can also assign a serial number to each organ for further output. Because the  
 208 number of maize organs is relatively small, this interactive correction operation is convenient and acceptable.  
 209 The derived seed points of each organ are set into the corresponding instance point cloud  $\Phi_s^i$ . At this time,  
 210 each leaf, tassel, and ear instance point cloud only contains the highest point, and there are multiple points in  
 211 the pot and stem instances.

## 212 2.5.2 Coarse segmentation based on optimal transportation distances

213 After obtaining the seed points of all the instances, the left points in  $\Phi_u$  were traversed one by one to  
 214 determine the instance to which they belong. For each point to  $\Phi_u$ , the distance between the point and each  
 215 other point cloud instance were evaluated, and it was classified into the nearest instance. The classified points  
 216 were evaluated from top to bottom; that is, the points with bigger  $z$  coordinates were evaluated preferentially.  
 217 The process was as follows:

218 Step 1: The points in the point set  $\Phi_u$  were reordered from big to small according to their  $z$  values.

219 Step 2: For point  $p \in \Phi_u$ , the organ instance it belongs to was determined. The distance  $d^i$  from point  
 220  $p$  to the  $i^{\text{th}}$  instance was defined as

$$221 \quad d^i = D_s(p, \tilde{p}^i)$$

222 Where  $D_s$  is the optimal transportation distance between any two points calculated based on the  
 223 sinkhorn algorithm [39]. Then point  $p$  is assigned into the organ instance with the lowest  $d^i$ .  $\tilde{p}^i$ , in the  $i^{\text{th}}$   
 224 instance, is the nearest neighbor of point  $p$  under the optimal transportation distance.

225 Step 3: Move point  $p$  from  $\Phi_u$  into the corresponding  $\Phi_s^i$ . Continue traversing the next point in  $\Phi_u$ ,  
 226 and perform step 2 until  $\Phi_u$  is empty.

227 Detailed description of  $D_s$  in step 2 is explained here. The optimal transportation strategy of point  
 228 cloud  $Q$  to its identical set  $Q'$  is that transmit all the quality of any point  $p \in Q$  to the same point  $p' \in$   
 229  $Q'$ . The Sinkhorn algorithm [39] was used here to calculate the optimal transportation distances. It allocates  
 230 the quality of any point  $p \in Q$  to all points in  $Q'$ . A point with higher allocation quality suggests the point  
 231 is closer to  $p$  than any other points under the optimal transportation strategy. Suppose that point cloud  $Q$   
 232 contains  $N_Q$  points.  $Q'$  represents the same point set of  $Q$ .  $p_u$  is the  $u^{\text{th}}$  point in  $Q$ , and  $M_u$  indicates the  
 233 quality of point  $p_u$ . Similarly,  $p'_v$  is the  $v^{\text{th}}$  point in  $Q'$ , and  $M'_v$  indicates the quality of point  $p'_v$ .  $m_{uv}$   
 234 represents the transported quality from  $p_u \in Q$  to  $p'_v \in Q'$ . Then the optimal transportation energy from  
 235 point cloud  $Q$  to point cloud  $Q'$  can be described as:

$$236 \quad \operatorname{argmin}_m \sum_{u=1}^{N_Q} \sum_{v=1}^{N_Q} m_{uv} \|p_u - p'_v\| + \frac{1}{\varepsilon} \sum_{u=1}^{N_Q} \sum_{v=1}^{N_Q} m_{uv} \log m_{uv}$$

237

$$\text{s. t. } m_{uv} > 0; \sum_{v=1}^{N_Q} m_{uv} = M_u; \sum_{u=1}^{N_Q} m_{uv} = M'_v$$

238

239

240

241

242

243

244

$$D_s(p_u, p_v) = \frac{1}{m_{uv}}.$$

245

246

247

248

249

250

251

252

253

In this equation,  $\varepsilon$  is the adjusting parameter, which was set to 5 in this paper, and  $\| \cdot \|$  is the  $L_2$  normal form. The above equation can be solved by Sinkhorn's matrix scaling algorithm [40], and the optimal transportation from  $Q$  to  $Q'$  can be derived, that is, an  $N_Q \times N_Q$  optimal transportation matrix  $M$  is obtained. The element  $m_{uv}$  at  $u$  row and  $v$  column in the matrix is the transported quality from the  $u^{\text{th}}$  to the  $v^{\text{th}}$  point. A larger  $m_{uv}$  indicates that the two points are closer. After obtaining the optimal transportation solution, the optimal transportation distance from the  $u^{\text{th}}$  to the  $v^{\text{th}}$  point in the point cloud can be defined as

In the optimal transportation energy equation, when parameter  $\varepsilon$  increases, the transportation strategy gets closer to the classical optimal transportation, and the segmentation result using optimal transportation distance  $D_s$  is also closer to that using Euclidean distance. The same results can be derived using the two distances when the  $\varepsilon$  is greater than 100. When  $\varepsilon$  is smaller, the solution becomes smoother, and the nearest neighbour calculated under the  $D_s$  distance tends to the region with higher point density. Compared with the Euclidean distance, using the optimal transportation distance to estimate the distance between points can better deal with the challenge of big leaves wrapping on leaflets than using the Euclidean distance (Figure 4A and B). When the adhesion area of the two organs is not significantly large, the segmentation results using the optimal transportation distance is better than that of the Euclidean distance (Figure 4C and D).

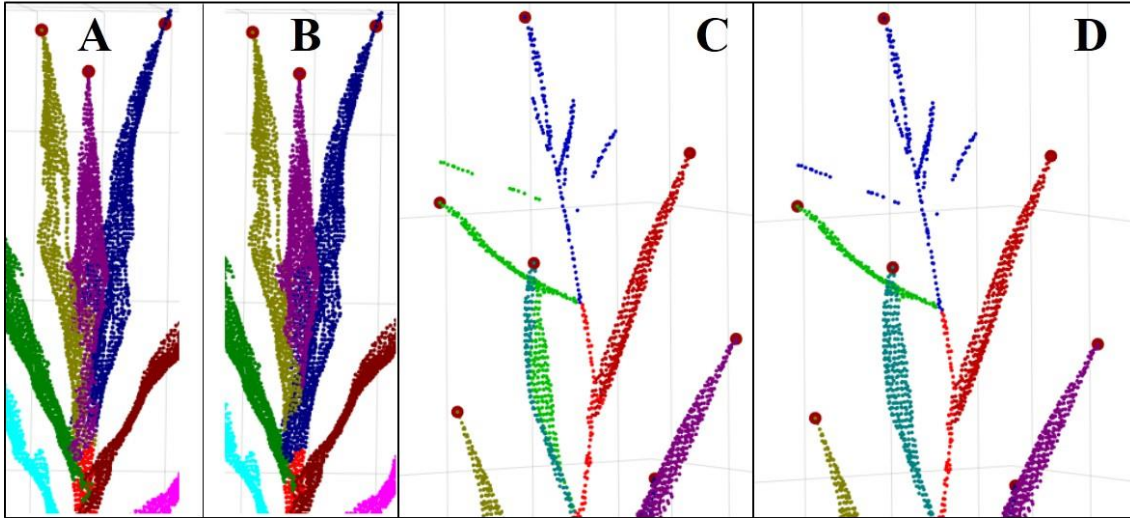

254

255

256

257

258

Figure 4: Organ segmentation Comparison using optimal transportation distance and Euclidean distance. Point cloud segmentation result for big leaf wrapping small leaf base case using Euclidean distance (A) and optimal transportation distance (B). Point cloud segmentation result for close or slight organ adhesion case using Euclidean distance (C) and optimal transportation distance (D).

259

## 2.6 Fine segmentation of organs

260

261

262

263

264

265

Coarse segmentation can provide preliminary results but false segmentation is frequently observed in the intersecting regions of organs. To obtain more precise segmentation results, this study developed a fine segmentation module for organs in Label3DMAize, which included the following processes:

Step 1:  $n$  ( $n > 1$ ) organ instances to be fine segmented were selected, and  $\phi_{s'}^i$  represents the  $i^{\text{th}}$  instance.

Step 2: The region of interest was selected among the above instance point cloud, represented by  $\phi_s^i$ .

Step 3: The seed point for the  $i^{\text{th}}$  instance  $\phi_s^i$ , was selected from region  $\phi_{s'}^i$ . The selected points were

266 removed from  $\Phi_{u'}$  and stored in  $\Phi_{s'}^i$ .

267 Step 4: The points in  $\Phi_{u'}$  were re-segmented using Markov Random Fields (MRF).

268 The re-segment algorithm was detailed using MRF in step 4, as explained in the following. The fine  
269 segmentation of the interest region mentioned above is a multi-classification problem. It allocates  $p_u \in \Phi_{u'}$   
270 into  $n$  organ instances  $\Phi_{s'}^i$ , i.e. search for the right organ tag for point  $p_u$ . Hence a mapping function  $f_n(p_u)$   
271 is defined for any point  $p_u$ . When a point  $p_u$  is mapped to the  $i^{\text{th}}$  instance,  $f_n(p_u) = i$ , the energy function  
272 is defined as:

$$273 \quad E(f_n) = \gamma \sum_{p_u \in \Phi_{u'}} D_{p_u}(f_n(p_u)) + \sum_{(p_u, q_u) \in \mathfrak{N}(p_u)} V(f_n(p_u), f_n(q_u))$$
$$274 \quad D_{p_u}(i) = D(p_u, \Phi_{s'}^i) \quad i = [1, 2 \dots n]$$
$$275 \quad V(f_n(p_u), f_n(q_u)) = \left(\frac{d(p_u, q_u)}{d'}\right)^\tau \left(\frac{a(n_p, n_u)}{\pi}\right)^\varphi$$

276 In this function,  $\mathfrak{N}(p_u)$  is the  $k$ -neighborhood of  $p_u \in \Phi_{u'}$ . The data item  $D_{p_u}(f_n(p_u))$  measures the  
277 loss of classifying  $p_u$  to  $n$  instances  $\Phi_{s'}^i$ .  $D(p_u, \Phi_{s'}^i)$  represents the distance from point  $p_u$  to instance  $\Phi_{s'}^i$ ,  
278 which is the distance from  $p_u$  to the nearest point in  $\Phi_{s'}^i$ .  $\gamma$  is a weight parameter that controls the  
279 proportion of distance term in the energy function. The smooth item  $V(f_n(p_u), f_n(q_u))$  quantifies the  
280 corresponding loss when assigning the tag  $f_n(p_u)$  and  $f_n(q_u)$  for point  $p_u$  and  $q_u$ , respectively. This  
281 smooth term encourages spatial consistency; that is, the probability that adjacent points belong to the same  
282 class is higher. The smooth term is composed of the product of the distance term on the left and the angle  
283 term on the right. Meanwhile,  $d(p_u, q_u)$  is the Euclidean distance of the two points and  $d'$  is the maximum  
284 Euclidean distance between all points and their neighbourhood points, regulating the distance term in the  
285 range of (0, 1].  $n_p$  and  $n_u$  are the normal vectors of points  $p_u$  and  $q_u$ , respectively.  $a(n_p, n_u)$  is the  
286 angle between the two normals.  $\tau$  and  $\varphi$  are the weight parameters for the distance and angle term,  
287 respectively, both with a default value of 1.0. The minimum solution of the energy function is solved by  $\alpha$ -  
288 expansion MRF [41].

## 289 2.7 Sample-based segmentation

290 It is suggested that the number of points per shoot should be less than 15000 to ensure data processing  
291 efficiency. Therefore, Label3DMAize provides point cloud simplification and sample-based segmentation  
292 modules. Voxel-based simplification is adopted in the toolkit. Sample-based segmentation refers to the  
293 automatic segmentation of dense point cloud via the segmentation result of the corresponding simplified  
294 point cloud. Specifically, suppose that point cloud  $A$  is the simplification of dense point cloud  $B$ , and  $A$  has  
295 already been segmented while  $B$  is to be segmented. Calculating the  $k$ -nearest neighbors in  $A$  of any point  
296  $p \in B$ , and then counts how many points of these  $k$ -nearest neighbors belong to each instance. The instance  
297 with the maximum neighbour points is determined as the instance of point  $p$ .

## 298 3 Results

### 299 3.1 Interface and operations of Label3DMAize

300 The Label3DMAize toolkit interface is composed of the main interface and multiple sub-interfaces,  
301 including stem segmentation, coarse segmentation, fine segmentation, and sample-based segmentation  
302 (Figure 5). Each sub-interface is popped up after the corresponding button on the main interface is triggered.  
303 The main interface and each sub-interface are composed of an embedded dialog and an interactive visual  
304 window (only the embedded dialog in each sub-interface is shown in Figure 5). The interactive visual window  
305 enables the users to rotate, zoom, translate, select interested points in the view, and improve the segmentation

306 effect visually and interactively. The input of the toolkit includes point cloud files in text format, such as txt  
 307 or ply. According to the operational process shown in Figure 5, segmentation results can be refined step by  
 308 step by inputting parameters and manually selecting points. The output of the toolkit is a text file with  
 309 annotation information; that is, each 3D coordinate point in the text has a classification identification number,  
 310 and the points with the same identification number belong to the same instance. This format files are  
 311 applicable for 3D deep learning of maize shoots. The executable program of Label3DMAize can be found in  
 312 the attachment.

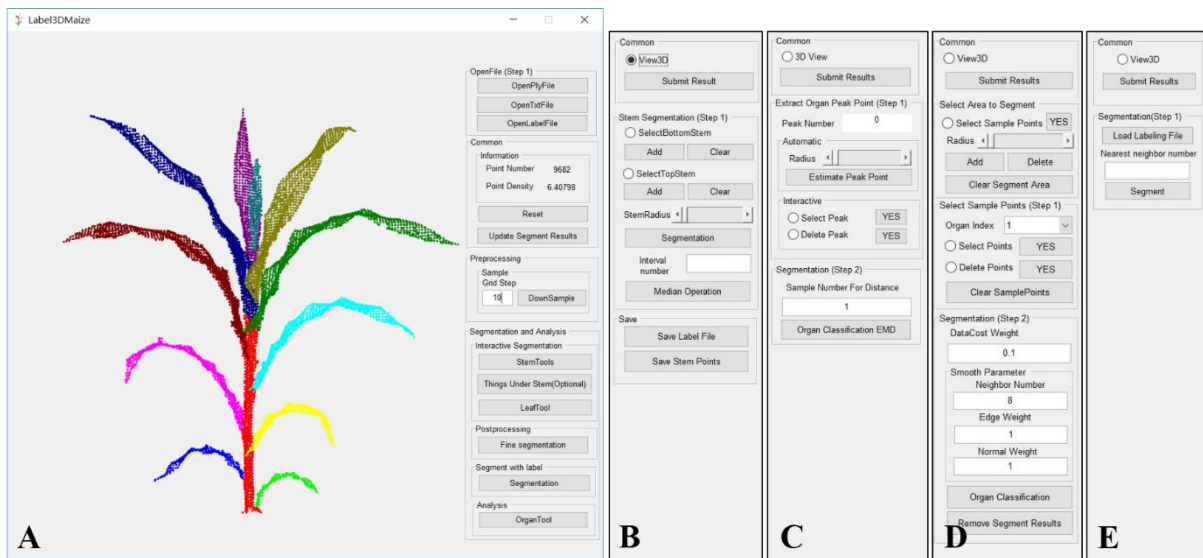

313  
 314 Figure 5: Interfaces of Label3DMAize. (A) The main interface of the toolkit, composed of a visualization window and an  
 315 embedded dialog. (B)-(E) Dialog of stem segmentation, coarse segmentation, fine segmentation, and sample-based  
 316 segmentation. The visualization window is not shown in these sub-interfaces.

### 317 3.2 Visualization and accuracy evaluation

318 To evaluate coarse and fine segmentation accuracy, the point clouds of three varieties in four different  
 319 growth stages of maize shoots are segmented using Label3DMAize. Figure 6 shows the visualization results.  
 320 According to the visualization results, no significant differences were observed between the coarse and fine  
 321 segmentation. Yet, fine segmentation improved the segmentation effect of the details, especially near the  
 322 connection region of organs.

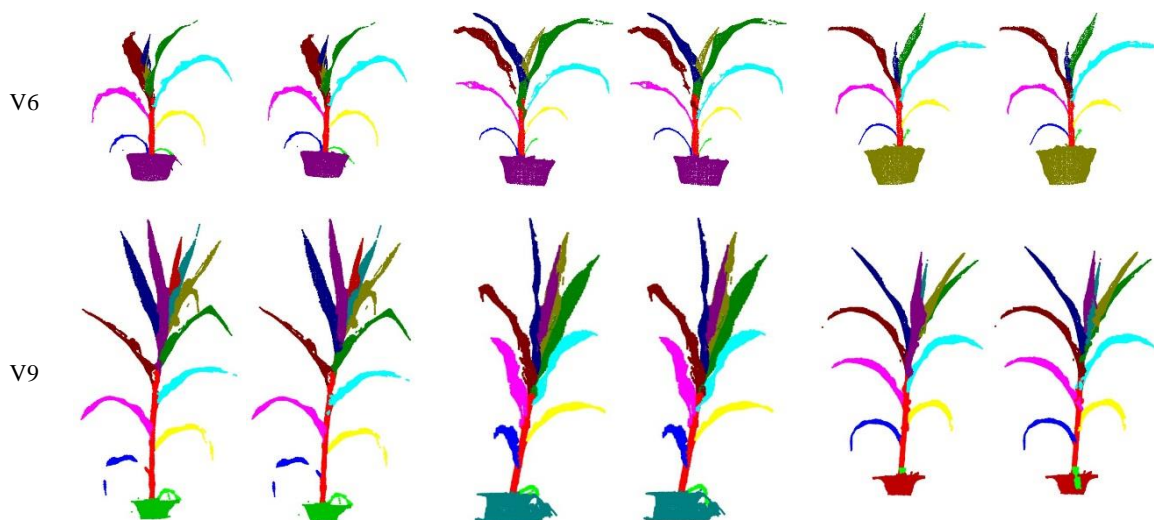



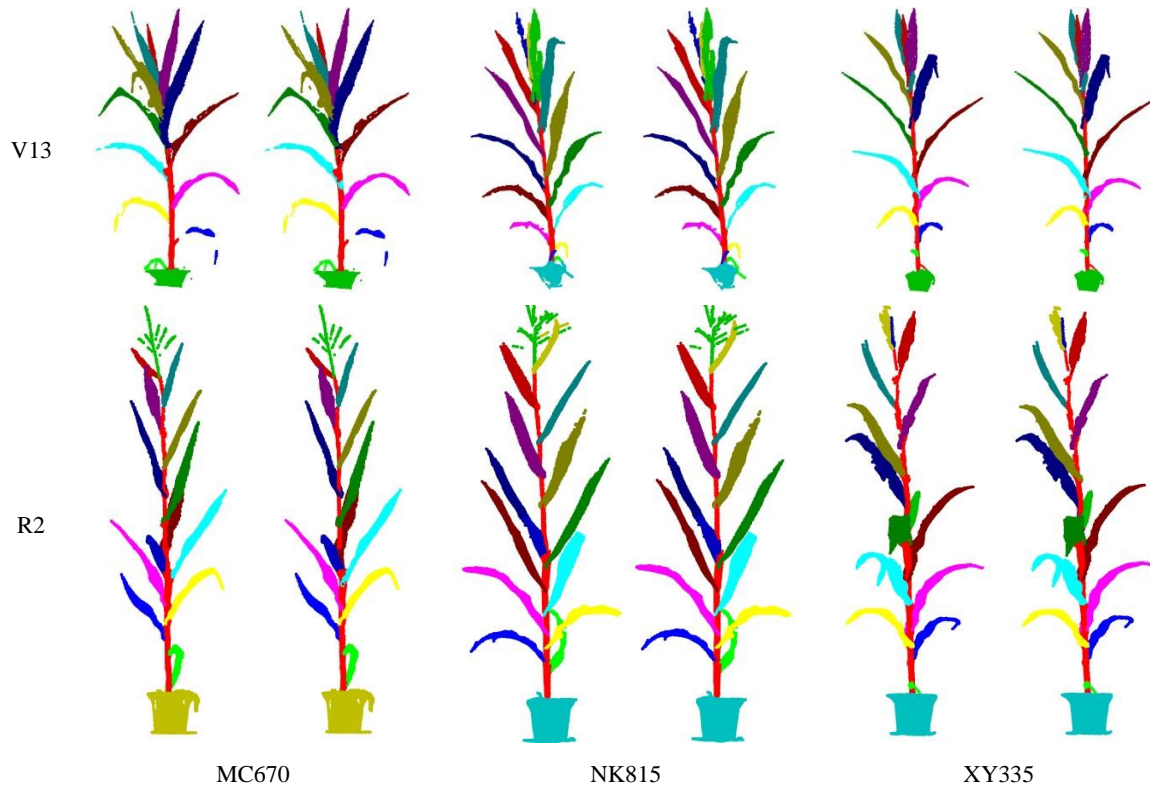

323 Figure 6 Visualization of maize shoot segmentation results of three cultivars at four growth stages. In each sub-figure, the left  
 324 and right are coarse and corresponding fine segmentation results, respectively.

325 This study has further provided numerical accuracy results to quantitatively evaluate the difference  
 326 between coarse and fine segmentation (Table 1). The precision, recall and F1-score of each organ were  
 327 estimated based on fine segmentation as the ground truth. The averaged precision and recall of all shoot  
 328 organs were taken as the precision and recall. Macro-F1 and micro-F1 are calculated using the precision and  
 329 recall of the shoot and organs averaged value, respectively. It can be seen from Table 1 that although the  
 330 accuracy of coarse and fine segmentation differed, the overall difference was not significant.

331 Table 1: Accuracy evaluation of coarse and fine segmentation

|      | Overall accuracy | Precision | Recall   | Micro-F1 | Macro-F1 |
|------|------------------|-----------|----------|----------|----------|
| Mean | 0.972099         | 0.967282  | 0.956173 | 0.961458 | 0.955593 |
| Min  | 0.897683         | 0.91954   | 0.841063 | 0.878553 | 0.853139 |
| Max  | 0.993867         | 0.991753  | 0.991315 | 0.991534 | 0.991175 |

### 332 3.3 Segmentation efficiency

333 The efficiency of plant point cloud segmentation is an essential indicator for the practicality for training  
 334 data annotation tools for deep learning. Table 2 shows the time consumed in the different steps for maize  
 335 shoot segmentation at four growth stages using Label3DMAize on a workstation (Intel Core i7 processor,  
 336 3.2GHz CPU, 32GB of memory, Windows 10 operating system), including the interactive manual operations  
 337 and segmentation computations. It can be seen that point cloud segmentation takes about 4-10 minutes per  
 338 shoot, in which coarse segmentation takes about 10%-20% of the total time. In the whole segmentation  
 339 process, the manual interaction time cost is significantly higher than that of automated computation. The  
 340 segmentation efficiency is positively related to the number of leaves.

341 This study also analyzed the detailed time costs. (1) The time cost of stem segmentation. In the early  
 342 growth stages of a maize shoot, the stem is relatively upright, so users only need to select the bottom and

343 upper points of the stem and specify a suitable radius. However, in the late growth stages, the maize shoot  
 344 height becomes higher, and the stem becomes thinner from bottom to top. Meanwhile, the upper part curves,  
 345 so interactive median segmentation is needed, which increases the segmentation time. (2) The time cost of  
 346 coarse segmentation. The major interactive operation of coarse segmentation is that the user selects or adjusts  
 347 the highest organ points. As the maize shoot grows, the number of organs gradually increases, so the time  
 348 costs for the interactive operation of picking points also increases. Meanwhile, the growth of shoot organs  
 349 significantly increases the occlusion among organs. Thus, the appropriate angles of view for users have to be  
 350 found to determine the highest organ points, which is time-consuming. (3) The time cost of fine segmentation.  
 351 An increase in the number of organs causes false segmentation of more organs at the connection regions.  
 352 Therefore, the fine segmentation of maize shoots with more organs would take more time. Besides, the  
 353 segmentation efficiency is related to the shoot architecture; the spatial distances between adjacent organs are  
 354 much larger in flattened shoots than that of relatively compact ones, which increases the segmentation  
 355 efficiency of flattened shoots.

356 Table 2: Segmentation time of different steps on maize shoots at four growth stages using Label3DMaize

| Growth<br>period | Point number of a<br>maize shoot |                         | Time cost (s)        |                |                      |                |                      |                      |                |                |                      |               |
|------------------|----------------------------------|-------------------------|----------------------|----------------|----------------------|----------------|----------------------|----------------------|----------------|----------------|----------------------|---------------|
|                  | Input                            | After<br>simplification | <u>t<sub>1</sub></u> | t <sub>2</sub> | <u>t<sub>3</sub></u> | t <sub>4</sub> | <u>t<sub>5</sub></u> | <u>t<sub>6</sub></u> | t <sub>7</sub> | t <sub>8</sub> | <u>t<sub>9</sub></u> | T             |
| V6               | 45833                            | 13196                   | 10                   | 0.2            | 16                   | 4              | 30.2                 | 120                  | 0.05           | 0.5            | 100                  | <b>250.75</b> |
| V9               | 62523                            | 13953                   | 10                   | 0.2            | 21                   | 4              | 35.2                 | 220                  | 0.05           | 0.6            | 100                  | <b>355.85</b> |
| V13              | 70873                            | 12102                   | 14                   | 0.2            | 32                   | 5              | 51.2                 | 400                  | 0.05           | 0.6            | 100                  | <b>551.85</b> |
| R2               | 71909                            | 13224                   | 14                   | 0.2            | 35                   | 5              | 54.2                 | 400                  | 0.05           | 0.6            | 100                  | <b>554.85</b> |

357 \* t<sub>1</sub>: Time for stem point selection and radius setting. t<sub>2</sub>: Time for segmentation computation of stem points. t<sub>3</sub>: Time for seed  
 358 points selection of organ instances. t<sub>4</sub>: Time for organ segment computation. t<sub>5</sub>: Time for coarse segmentation, where t<sub>5</sub>=  
 359 t<sub>1</sub>+t<sub>2</sub>+t<sub>3</sub>+t<sub>4</sub>. t<sub>6</sub>: Time for fine segmentation operations. t<sub>7</sub>: Time for fine segmentation computation. t<sub>8</sub>: Time for sample-based  
 360 segmentation. t<sub>9</sub>: Time for other operations, e.g., the alternation between main and sub-interfaces. T: Total time costs.  
 361 Underlined and un-underlined identifiers indicates the time cost for manual interactions and automated computation  
 362 respectively.

## 363 4 Discussion

### 364 4.1 Shoot-organ point cloud segmentation

365 Most non-destructive 3D data acquisition of plants focus on individual plant scale. Thus point cloud  
 366 segmentation from shoot to organ is of significance. Representative shoot-organ point cloud segmentation is  
 367 realized by region growing combined with adjusting leaf number and stem diameter parameters according to  
 368 the shoot architecture and stem morphological features [31]. Leaf overlap challenges shoot segmentation,  
 369 especially for upper leaves in compact shoot architecture. Besides, the robustness of the segmentation  
 370 algorithm also needs to be verified when processing many point clouds. Once the segmentation is complete,  
 371 it is difficult to correct the false segmentation points. Although commercial software, such as Geomagic  
 372 Studio, can solve this problem, it is quite complicated and time-consuming. In contrast, the Label3DMaize  
 373 toolkit integrates a top-to-down segmentation algorithm and interactive operations according to the  
 374 morphological structure of maize shoots, which can realize semi-automatic fine point cloud segmentation.  
 375 The top-to-down coarse segmentation ensures topological accuracy, and the interactive operations improve  
 376 the segmentation accuracy and details. Although coarse segmentation can meet the basic demand for  
 377 phenotype extraction, it is not satisfactory for high-precision phenotypic analysis and 3D reconstruction



---

378 based on point clouds. In contrast, fine segmentation is more satisfactory for the latter demands. The toolkit  
379 can solve the point cloud segmentation problem of compact architecture or organ overlapping shoots.  
380 Although skeleton extraction methods [29, 30] also provide an interactive way to improve the segmentation  
381 accuracy, they offer skeleton interaction, which hardly improves the segmentation point details.

382 Since 3D point cloud annotation tools for plants are lacking, researchers segment plants through multi-  
383 view image labelling, deep learning-based image segmentation, MVS reconstruction, and a voting strategy  
384 [42]. However, these methods cause a lot of organ occlusion from different view angles; thus, it is hard to  
385 segment plants with multiple organs through image labelling and MVS reconstruction. Jin et al. [32]  
386 transformed point cloud data into a voxel format, constructed a training set containing 3000 maize shoots via  
387 data enhancement, and proposed a convolutional neural network (VCNN) to segment stem and leaf point  
388 cloud of maize shoots. Label3DMaize enables researchers to directly handle 3D point cloud segmentation  
389 and data annotation without transforming point cloud data into the voxel form. Meanwhile, using the acquired  
390 data directly improves the diversity of training set data, rather than by data enhancement, and can thus  
391 improve the robustness of the learned model. In addition, label3DMaize can separate the tassel and ear except  
392 for the stem and leaf, facilitating phenotype extraction of the tassel (such as the number of tassel branches,  
393 the compactness of tassel, etc.) and ears (such as the ear height).

#### 394 **4.2 Practicability of Label3DMaize**

395 In our recent works, the MVS-Pheno platform [16] has been used to obtain high-throughput 3D point  
396 cloud data of maize shoots at different ecological sites for various genotypes and growth stages. However,  
397 the underlying knowledge about genotypes and the differences in cultivation management have not been fully  
398 explored, indicating that high-throughput phenotypic acquisition is far from practical application. Therefore,  
399 it is urgent to establish automatic and online data analysis approaches [43]. However, due to the complexity  
400 of plant morphological structure, it is difficult to realize automatic 3D segmentation from the plant  
401 morphological characteristics and regional growth method only. Deep learning is a feasible way to realize  
402 automatic segmentation by mining deep features of plant morphology. The greatest challenge in 3D point  
403 cloud segmentation by deep learning is the lack of high precision and efficient data annotation tools. Most of  
404 the existing 3D data annotation methods are for voxel data [32, 44], not 3D point clouds. Thus, Label3DMaize  
405 provides a practical tool for 3D point cloud data annotation for maize and could be a reference for other  
406 plants.

407 Unlike RGB image data annotation [35], data enhancement does not that significantly improve the  
408 model robustness of 3D point cloud segmentation models. Thus high-quality data annotation is important. It  
409 takes 4-10 minutes to label a maize shoot point cloud by Label3DMaize, and this labeling efficiency can  
410 meet the needs of constructing a training dataset for deep learning. The fine segmentation module in  
411 Label3DMaize ensures accurate segmentation of detailed features at the organ connections, and is thus  
412 satisfactory for organ-level 3D reconstruction. If high precision of the annotation is not required, coarse  
413 segmentation results can be used as the annotation data, thus saving a lot of time.

414 Point clouds with less noise are required when using Label3DMaize, so the toolkit is more suitable for  
415 segmenting point clouds derived by MVS reconstruction. For shoots with much random noise obtained by  
416 3D scanners [30], point cloud denoising should be performed first, and then set as input of the toolkit for  
417 segmentation. Compared with image annotation, the data annotation efficiency of Label3DMaize is still  
418 lower, and fine segmentation requires more manual interaction, which has higher requirements for user  
419 experience and concentration. Thus the algorithm for Label3DMaize needs improvement to raise the  
420 automation level of point cloud segmentation.

---

### 421 4.3 Future work

422 At present, a large amount of 3D point cloud data of maize shoots has been obtained using MVS-Pheno.  
423 In our future study, representative data will be selected and annotated by Label3DMAize, then a 3D maize  
424 shoot annotation dataset will be constructed. A deep learning-based point cloud segmentation model will then  
425 be developed to realize the automatic segmentation of maize shoots. Subsequently, online phenotypic  
426 extraction and 3D reconstruction of maize shoots algorithms will be studied using the well-segmented point  
427 clouds. The segmentation algorithm and this toolkit will be extended to other crops according to their  
428 morphological characteristics, which will promote the automatic 3D point cloud segmentation of plants.

### 429 Additional files

430 All the additional files can be found at <https://github.com/syau-miao/Label3DMAize.git>

431 **Supplementary Program.** Executable program of Label3DMAize, which requires that Matlab runtime  
432 (Version 9.2 or above) installed.

433 **Supplementary Data S1.** The acquired point clouds of maize shoots described in Section “Field experiment  
434 and data acquisition”, also as the input of the program.

435 **Supplementary Data S2.** Coarse segmentation results of the input shoots.

436 **Supplementary Data S3.** Fine segmentation results, derived based on the coarse ones.

437 **Supplementary Data S4.** Sample based segmentation results, derived from the fine segmentation results.

### 438 Acknowledgements

439 This work was partially supported by Construction of Collaborative Innovation Center of Beijing  
440 Academy of Agricultural and Forestry Sciences (KJCX201917), Science and Technology Innovation Special  
441 Construction Funded Program of Beijing Academy of Agriculture and Forestry Sciences, the National  
442 Natural Science Foundation of China (31871519), Reform and Development Project of Beijing Academy of  
443 agricultural and Forestry Sciences, China Agriculture Research System (CARS-02), and the Construction of  
444 Scientific Research and Innovation Platform in Beijing Academy of Agriculture and Forestry Sciences  
445 (PT2020-24). We would like to thank Tianjun Xu, in Maize Research Center of Beijing Academy of  
446 agricultural and Forestry Sciences, for providing experimental materials.

### 447 References

- 448 1. Bucksch A, Atta-Boateng A, Azihou AF, Battogtokh D, Baumgartner A, Binder BM, et al.  
449 Morphological Plant Modeling: Unleashing Geometric and Topological Potential within the Plant  
450 Sciences. *Front Plant Sci.* 2017;8:16. doi:10.3389/fpls.2017.00900.
- 451 2. Gibbs JA, Pound M, French AP, Wells DM, Murchie E and Pridmore T. Approaches to three-  
452 dimensional reconstruction of plant shoot topology and geometry. *Funct Plant Biol.* 2017;44  
453 1:62-75. doi:10.1071/FP16167.

- 
- 454 3. Lin Y. LiDAR: An important tool for next-generation phenotyping technology of high potential for  
455 plant phenomics? *Comput Electron Agric.* 2015;119:61-73. doi:10.1016/j.compag.2015.10.011.
- 456 4. Zhao C, Zhang Y, Du J, Guo X, Wen W, Gu S, et al. Crop Phenomics: Current Status and  
457 Perspectives. *Front Plant Sci.* 2019;10:714. doi:10.3389/fpls.2019.00714.
- 458 5. Perez-Sanz F, Navarro PJ and Egea-Cortines M. Plant phenomics: an overview of image  
459 acquisition technologies and image data analysis algorithms. *GigaScience.* 2017;6 11:18.  
460 doi:10.1093/gigascience/gix092.
- 461 6. Rahman A, Mo C and Cho B-K. 3-D Image Reconstruction Techniques for Plant and Animal  
462 Morphological Analysis-A Review. *Journal of Biosystems Engineering.* 2017;42 4:339-49.
- 463 7. Vos J, Evers JB, Buck-Sorlin GH, Andrieu B, Chelle M and de Visser PHB. Functional-structural  
464 plant modelling: a new versatile tool in crop science. *J Exp Bot.* 2010;61 8:2101-15.  
465 doi:10.1093/jxb/erp345.
- 466 8. Louarn G and Song Y. Two decades of functional–structural plant modelling: now addressing  
467 fundamental questions in systems biology and predictive ecology. *Ann Bot.* 2020;126 4:501-9.  
468 doi:10.1093/aob/mcaa143.
- 469 9. Ziamtsov I and Navlakha S. Machine Learning Approaches to Improve Three Basic Plant  
470 Phenotyping Tasks Using Three-Dimensional Point Clouds. *Plant Physiol.* 2019;181 4:1425-40.  
471 doi:10.1104/pp.19.00524.
- 472 10. Rist F, Herzog K, Mack J, Richter R, Steinhage V and Töpfer R. High-Precision Phenotyping of  
473 Grape Bunch Architecture Using Fast 3D Sensor and Automation. *Sensors.* 2018;18 3:763.

---

474 doi:10.3390/s18030763.

475 11. Thapa S, Zhu F, Walia H, Yu H and Ge Y. A Novel LiDAR-Based Instrument for High-  
476 Throughput, 3D Measurement of Morphological Traits in Maize and Sorghum. *Sensors*. 2018;18  
477 4:1187. doi:10.3390/s18041187.

478 12. Hu Y, Wang L, Xiang L, Wu Q and Jiang H. Automatic Non-Destructive Growth Measurement  
479 of Leafy Vegetables Based on Kinect. *Sensors*. 2018;18 3:806. doi:10.3390/s18030806.

480 13. Chaivivatrakul S, Tang L, Dailey MN and Nakarmi AD. Automatic morphological trait  
481 characterization for corn plants via 3D holographic reconstruction. *Comput Electron Agric*.  
482 2014;109:109-23. doi:j.compag.2014.09.005.

483 14. Elnashef B, Filin S and Lati RN. Tensor-based classification and segmentation of three-  
484 dimensional point clouds for organ-level plant phenotyping and growth analysis. *Comput  
485 Electron Agric*. 2019;156:51-61. doi:<https://doi.org/10.1016/j.compag.2018.10.036>.

486 15. Duan T, Chapman SC, Holland E, Rebetzke GJ, Guo Y and Zheng B. Dynamic quantification  
487 of canopy structure to characterize early plant vigour in wheat genotypes. *J Exp Bot*. 2016;67  
488 15:4523-34. doi:10.1093/jxb/erw227.

489 16. Wu S, Wen W, Wang Y, Fan J, Wang C, Gou W, et al. MVS-Pheno: A Portable and Low-Cost  
490 Phenotyping Platform for Maize Shoots Using Multiview Stereo 3D Reconstruction. *Plant  
491 Phenomics*. 2020;2020:17. doi:10.34133/2020/1848437.

492 17. Zhang XH, Huang CL, Wu D, Qiao F, Li WQ, Duan LF, et al. High-Throughput Phenotyping and  
493 QTL Mapping Reveals the Genetic Architecture of Maize Plant Growth. *Plant Physiol*. 2017;173

- 
- 494 3:1554-64. doi:10.1104/pp.16.01516.
- 495 18. Cabrera-Bosquet L, Fournier C, Bricet N, Welcker C, Suard B and Tardieu F. High-throughput  
496 estimation of incident light, light interception and radiation-use efficiency of thousands of plants  
497 in a phenotyping platform. *New Phytol.* 2016;212 1:269-81. doi:10.1111/nph.14027.
- 498 19. Jin S, Su Y, Song S, Xu K, Hu T, Yang Q, et al. Non-destructive estimation of field maize  
499 biomass using terrestrial lidar: an evaluation from plot level to individual leaf level. *Plant*  
500 *Methods.* 2020;16 1:69. doi:10.1186/s13007-020-00613-5.
- 501 20. Zermas D, Morellas V, Mulla D and Papanikolopoulos N. 3D model processing for high  
502 throughput phenotype extraction – the case of corn. *Comput Electron Agric.* 2019:105047.  
503 doi:<https://doi.org/10.1016/j.compag.2019.105047>.
- 504 21. Jin SC, Su YJ, Gao S, Wu FF, Hu TY, Liu J, et al. Deep Learning: Individual Maize Segmentation  
505 From Terrestrial Lidar Data Using Faster R-CNN and Regional Growth Algorithms. *Front Plant*  
506 *Sci.* 2018;9:10. doi:10.3389/fpls.2018.00866.
- 507 22. Zhan Q, Liang Y and Xiao Y. Color-based segmentation of point clouds. *Laser scanning.* 2009,  
508 p. 248-52.
- 509 23. Itakura K and Hosoi F. Automatic Leaf Segmentation for Estimating Leaf Area and Leaf  
510 Inclination Angle in 3D Plant Images. *Sensors.* 2018;18 10:3576.
- 511 24. Sun SP, Li CY, Chee PW, Paterson AH, Jiang Y, Xu R, et al. Three-dimensional  
512 photogrammetric mapping of cotton bolls in situ based on point cloud segmentation and  
513 clustering. *ISPRS-J Photogramm Remote Sens.* 2020;160:195-207.

- 
- 514 doi:10.1016/j.isprsjprs.2019.12.011.
- 515 25. Li D, Shi G, Kong W, Wang S and Chen Y. A Leaf Segmentation and Phenotypic Feature  
516 Extraction Framework for Multiview Stereo Plant Point Clouds. *IEEE Journal of Selected Topics  
517 in Applied Earth Observations and Remote Sensing.* 2020;13:2321-36.  
518 doi:10.1109/JSTARS.2020.2989918.
- 519 26. Paulus S, Dupuis J, Mahlein AK and Kuhlmann H. Surface feature based classification of plant  
520 organs from 3D laserscanned point clouds for plant phenotyping. *BMC Bioinformatics.*  
521 2013;14:12. doi:<http://dx.doi.org/10.1186/1471-2105-14-238>.
- 522 27. Wahabzada M, Paulus S, Kersting K and Mahlein AK. Automated interpretation of 3D  
523 laserscanned point clouds for plant organ segmentation. *BMC Bioinformatics.* 2015;16:11.  
524 doi:10.1186/s12859-015-0665-2.
- 525 28. Li YY, Fan XC, Mitra NJ, Chamovitz D, Cohen-Or D and Chen BQ. Analyzing Growing Plants  
526 from 4D Point Cloud Data. *ACM Trans Graph.* 2013;32 6:10. doi:10.1145/2508363.2508368.
- 527 29. Xiang LR, Bao Y, Tang L, Ortiz D and Salas-Fernandez MG. Automated morphological traits  
528 extraction for sorghum plants via 3D point cloud data analysis. *Comput Electron Agric.*  
529 2019;162:951-61. doi:10.1016/j.compag.2019.05.043.
- 530 30. Wu S, Wen W, Xiao B, Guo X, Du J, Wang C, et al. An Accurate Skeleton Extraction Approach  
531 From 3D Point Clouds of Maize Plants. *Front Plant Sci.* 2019;10:248.  
532 doi:10.3389/fpls.2019.00248.
- 533 31. Jin SC, Su YJ, Wu FF, Pang SX, Gao S, Hu TY, et al. Stem-Leaf Segmentation and Phenotypic

- 
- 534 Trait Extraction of Individual Maize Using Terrestrial LiDAR Data. *IEEE Trans Geosci Remote*  
535 *Sensing*. 2019;57 3:1336-46. doi:10.1109/tgrs.2018.2866056.
- 536 32. Jin S, Su Y, Gao S, Wu F, Xu K, Ma Q, et al. Separating the Structural Components of Maize  
537 for Field Phenotyping Using Terrestrial LiDAR Data and Deep Convolutional Neural Networks.  
538 *IEEE Trans Geosci Remote Sensing*. 2019;58 4:2644 - 58. doi:10.1109/TGRS.2019.2953092.
- 539 33. Griffiths D and Boehm J. A Review on Deep Learning Techniques for 3D Sensed Data  
540 Classification. *Remote Sensing*. 2019;11 12:29. doi:10.3390/rs11121499.
- 541 34. Bernotas G, Scorza LCT, Hansen MF, Hales IJ, Halliday KJ, Smith LN, et al. A photometric  
542 stereo-based 3D imaging system using computer vision and deep learning for tracking plant  
543 growth. *GigaScience*. 2019;8 5:15. doi:10.1093/gigascience/giz056.
- 544 35. Russell BC, Torralba A, Murphy KP and Freeman WT. LabelMe: A database and web-based  
545 tool for image annotation. *Int J Comput Vis*. 2008;77 1-3:157-73. doi:10.1007/s11263-007-0090-  
546 8.
- 547 36. Dutagaci H, Rasti P, Galopin G and Rousseau D. ROSE-X: an annotated data set for evaluation  
548 of 3D plant organ segmentation methods. *Plant Methods*. 2020;16 1:14. doi:10.1186/s13007-  
549 020-00573-w.
- 550 37. Gené-Mola J, Sanz-Cortiella R, Rosell-Polo JR, Morros JR, Ruiz-Hidalgo J, Vilaplana V, et al.  
551 Fuji-SfM dataset: A collection of annotated images and point clouds for Fuji apple detection and  
552 location using structure-from-motion photogrammetry. *Data in Brief*. 2020;30:105591.
- 553 38. Abendroth LJ, Elmore RW, Matthew J. Boyer and Marlay SK. *Corn Growth and Development*.



- 
- 554 Report no. PMR 1009, 2011. Ames, Iowa: Iowa State University Extension.
- 555 39. Cuturi M. Sinkhorn Distances: Lightspeed Computation of Optimal Transportation Distances.  
556 Advances in Neural Information Processing Systems. 2013;26:2292-300.
- 557 40. Richard S. Diagonal equivalence to matrices with prescribed row and column sums. The  
558 American Mathematical Monthly. 1967;74 4:402-5.
- 559 41. Boykov Y and Kolmogorov V. An experimental comparison of min-cut/max-flow algorithms for  
560 energy minimization in vision. IEEE Trans Pattern Anal Mach Intell. 2004;26 9:1124-37.  
561 doi:10.1109/tpami.2004.60.
- 562 42. Shi WN, van de Zedde R, Jiang HY and Kootstra G. Plant-part segmentation using deep  
563 learning and multi-view vision. Biosys Eng. 2019;187:81-95.  
564 doi:10.1016/j.biosystemseng.2019.08.014.
- 565 43. Artzet S, Chen T-W, Chopard J, Brichet N, Mielewczik M, Cohen-Boulakia S, et al. Phenomenal:  
566 An automatic open source library for 3D shoot architecture reconstruction and analysis for  
567 image-based plant phenotyping. bioRxiv. 2019:805739. doi:10.1101/805739.
- 568 44. Liu Z, Tang H, Lin Y and Han S. Point-Voxel CNN for Efficient 3D Deep Learning. *33rd*  
569 *Conference on Neural Information Processing Systems*. Vancouver, Canada: Curran  
570 Associates, Inc., 2019, p. 965-75.

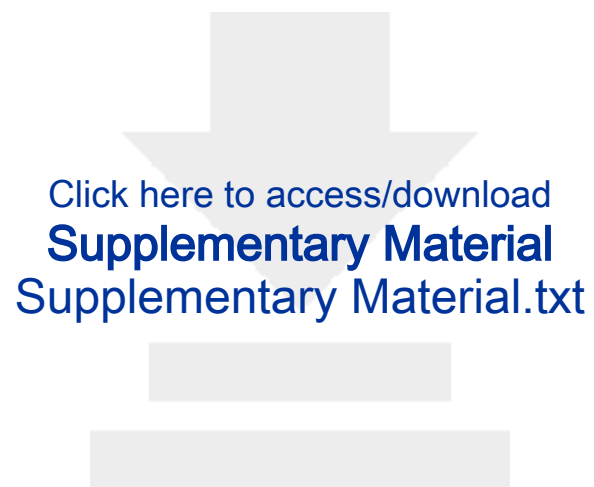

Dear Editors,

We would like to submit the enclosed manuscript entitled "Label3DMAize: toolkit for 3D point cloud data annotation of maize shoots " to the Collection of "Plant Phenomics: Data Integration and Analyses ".

The work described has not been submitted elsewhere for publication, in whole or in part, and all the authors listed have approved the manuscript that is enclosed. We believe that the contents of this manuscript will interest the general readers of your journal. This paper reports the development of a 3D point cloud annotation toolkit, Label3DMAize, which integrates a proposed point cloud segmentation algorithm and interactive operations. The toolkit aims to provide practical means to solve numerous challenges of point cloud data annotation and construct training datasets to study 3D deep learning models for plants. To our knowledge, this is the first 3D point cloud annotation tool for plants. Label3DMAize is a practical 3D point cloud tool for maize data annotation and is a reference for other plants. It provides technical support to improve the automation level of plant point cloud segmentation, even for high-throughput 3D plant phenotyping.

Thank you very much for your time and consideration.

Sincerely yours,

Xinyu Guo
